# Supplementary material
Source: publisher site journal article supplement (https://www.dovepress.com/article/224925)
Supplement: Supplementary file 1 [file get_supplementary_file.php]

***Appendix 1: Pre-course careers questionnaire***

**Undergraduates: Future Careers Aspiration Questionnaire**

1. What is your **current/anticipated** career aspiration? (Please **circle ONE**)

Medicine Surgery General Practice Paediatrics Ophthalmology

Anaesthetics /ITU Emergency Medicine Academia/Research Public Health

Other/Undecided Radiology Psychiatry Dermatology Pathology

Obs and Gynae Chemical Pathology MaxFacs Occupational Medicine

1. Have you **EVER** considered a career in surgery? **Yes No**
2. Have you **EVER** considered a career in ENT? **Yes No**
3. Do you feel a **presentation** as part of the foundation curriculum related to a **career** in ENT would be helpful? **Yes No**
4. What puts you **OFF** a career in surgery? Please **circle** **THREE MOST** important to you?

- Examinations

- Length of training

- Work-Life Balance

- Stress

- Bullying/Harassment

- Others’ experiences: trainees/seniors/consultants

- Previous experiences as a medical student

- Need for ongoing academic work: courses/audits/presentations/publications

- Lack of insight/understanding into surgery and its sub-specialties

- Perceived poor dexterity / technical ability to undertake the role

1. Which of the following would **encourage** you to consider a career in surgery? (please **circle** the **THREE MOST** important)

- Good work/life balance

- Less out of hours work/on-call demand

- Ability to carry out on-call commitments ‘from home’, as a non-resident in the hospital

- Good surgical and clinical training/exposure

- Ability to treat adults AND children

- Ability to sub-specialise

- Ability to be a generalist: Who can see, treat and manage common conditions/presentations

- Ability to treat benign AND malignant diseases/conditions

**1= Complete awareness 2= Rough idea 3= Minimal awareness 4= No idea**

|  |  |  |  |  |
| --- | --- | --- | --- | --- |
| Rate your knowledge of **qualifications/exams** required for a career in ENT Surgery? | 1 | 2 | 3 | 4 |
| Rate your knowledge of the **training pathway / career progression** for ENT? | 1 | 2 | 3 | 4 |
| Rate your knowledge of **on call/out of hours demands** for ENT as a trainee and consultant? | 1 | 2 | 3 | 4 |
| Rate your knowledge of the **sub-specialties/special interests** within ENT? | 1 | 2 | 3 | 4 |
| Rate your knowledge of the **main setting** for delivery of ENT care e.g. **clinic/theatre/ward**? | 1 | 2 | 3 | 4 |
| Rate your knowledge of the members within the **MDT** in ENT? | 1 | 2 | 3 | 4 |
| Rate your **knowledge** of **common acute** ENT pathologies and how to treat/manage them? | 1 | 2 | 3 | 4 |
| How **confident** do you feel to diagnose and treat common ENT pathology on your **own**? | 1 | 2 | 3 | 4 |

***Appendix 2: Post-course careers questionnaire***

| *Teacher/Date* | **Mr Vikas Acharya/ Dr Sanjana Bhalla/**  **Dr James Arwyn-Jones** | **13/11/18** |
| --- | --- | --- |

| *Session Title* | **Choosing a career in surgery / ENT for final year medical students** |
| --- | --- |

| *1. The level* | **Too basic** | **About right** | **Too difficult** |
| --- | --- | --- | --- |

| *2. The amount of content* | **Too little** | **About right** | **Too much** |
| --- | --- | --- | --- |

*3. Overall*

**Irrelevant Stimulating Enjoyable**

**Threatening Vague Informative Practical**

**Baffling Uninteresting Worthwhile Interesting**

**Repetitive Nothing new Relevant Clear**

Was the information on a surgical **career** pathway **useful**? **Yes** **No**

Was the information on an ENT specific **career** pathway **useful**? **Yes** **No**

Are you now more likely to consider a career in **surgery(generic)**? **Yes** **No**

Are you now more likely to consider a career in **ENT surgery**? **Yes** **No**

Are you now more aware of the different areas of ENT? **Yes** **No**

Are you now more aware of the type of work they do and can do? **Yes** **No**

Are you now more aware of the work-life balance in ENT? **Yes** **No**

Are you now more aware of the kinds of patients they treat? **Yes** **No**

Are you now more aware of the surgery/ENT career pathway? **Yes** **No**

**1= Complete awareness 2= Rough idea 3= Minimal awareness 4= No idea**

|  |  |  |  |  |
| --- | --- | --- | --- | --- |
| Rate your knowledge of **qualifications/exams** required for a career in ENT Surgery? | 1 | 2 | 3 | 4 |
| Rate your knowledge of the **training pathway / career progression** for ENT? | 1 | 2 | 3 | 4 |
| Rate your knowledge of **on call/out of hours demands** for ENT as a trainee and consultant? | 1 | 2 | 3 | 4 |
| Rate your knowledge of the **sub-specialties/special interests** within ENT? | 1 | 2 | 3 | 4 |
| Rate your knowledge of the **main setting** for delivery of ENT care e.g. **clinic/theatre/ward**? | 1 | 2 | 3 | 4 |
| Rate your knowledge of the members within the **MDT** in ENT? | 1 | 2 | 3 | 4 |
| Rate your **knowledge** of **common acute** ENT pathologies and how to treat/manage them? | 1 | 2 | 3 | 4 |
| How **confident** do you feel to diagnose and treat common ENT pathology on your **own**? | 1 | 2 | 3 | 4 |

***Reason for attending simulation session:***

***Other feedback/ comments:***

***Overall Score out of 10:***

***1 2 3 4 5 6 7 8 9 10***

***Appendix 3: Simulation questionnaire***

Induction with Simulation for Basic ENT Emergencies

How much ENT experience have you had so far?

|  | Please indicate number of weeks |
| --- | --- |
| Medical school |  |
| FY1 |  |
| FY2 |  |
| CT1 |  |
| CT2 |  |
| Other (courses etc)  Please provide course details |  |

1. Would you consider a long term career as an ENT specialist? Please circle your response

No Unsure / maybe Yes

2. Would you be confident to perform microsuction of the ears?

0---1---2---3---4---5---6---7---8---9---10

Not at all Unsure Very confident

3. Would you be confident to remove a foreign body from the ear/nose?

0---1---2---3---4---5---6---7---8---9---10

Not at all Unsure Very confident

4. Would you be confident to attempt cautery in order to manage epistaxis?

0---1---2---3---4---5---6---7---8---9---10

Not at all Unsure Very confident

5. Would you be confident to attempt anterior and posterior nasal packing in order to manage epistaxis?

0---1---2---3---4---5---6---7---8---9---10

Not at all Unsure Very confident

6. How confident are you at performing flexible nasendoscopy?

0---1---2---3---4---5---6---7---8---9---10

Not at all Unsure Very confident

7. How confident are you in the assessment of an unwell patient with a tracheostomy?

0---1---2---3---4---5---6---7---8---9---10

Not at all Unsure Very confident

8. How confident are you at diagnosing and draining a quinsy?

0---1---2---3---4---5---6---7---8---9---10

Not at all Unsure Very confident

9. How anxious are you about managing ENT emergencies regarding airways?

0---1---2---3---4---5---6---7---8---9---10

Not at all Unsure Very anxious

10. How anxious are you regarding managing ENT emergencies regarding the ear?

0---1---2---3---4---5---6---7---8---9---10

Not at all Unsure Very anxious

11. How anxious are you regarding managing ENT emergencies regarding the nose?

0---1---2---3---4---5---6---7---8---9---10

Not at all Unsure Very anxious

12. How anxious are you regarding managing ENT emergencies regarding the throat?

0---1---2---3---4---5---6---7---8---9---10

Not at all Unsure Very anxious

Post Course Feedback

13. I found this course helpful

0---1---2---3---4---5---6---7---8---9---10

Not at all Unsure Very helpful

14. Practising flexible nasendoscopy on the simulator was valuable

0---1---2---3---4---5---6---7---8---9---10

Not at all Unsure Very valuable

15. Practising on the otology simulator was valuable

0---1---2---3---4---5---6---7---8---9---10

Not at all Unsure Very valuable

16. Practising nasal packing on the simulator was valuable

0---1---2---3---4---5---6---7---8---9---10

Not at all Unsure Very valuable

17. Practising on the quinsy simulator was valuable

0---1---2---3---4---5---6---7---8---9---10

Not at all Unsure Very valuable

18. Would you be confident to perform microsuction of the ears?

0---1---2---3---4---5---6---7---8---9---10

Not at all Unsure Very confident

19. Would you be confident to remove a foreign body from the ear/nose?

0---1---2---3---4---5---6---7---8---9---10

Not at all Unsure Very confident

20. Would you be confident to attempt cautery in order to manage epistaxis?

0---1---2---3---4---5---6---7---8---9---10

Not at all Unsure Very confident

21. Would you be confident to attempt anterior and posterior nasal packing in order to manage epistaxis?

0---1---2---3---4---5---6---7---8---9---10

Not at all Unsure Very confident

22. How confident are you at performing flexible nasendoscopy?

0---1---2---3---4---5---6---7---8---9---10

Not at all Unsure Very confident

23. How confident are you in the assessment of an unwell patient with a tracheostomy?

0---1---2---3---4---5---6---7---8---9---10

Not at all Unsure Very confident

24. How confident are you at diagnosing and draining a quinsy?

0---1---2---3---4---5---6---7---8---9---10

Not at all Unsure Very confident

25. How anxious are you about managing ENT emergencies regarding airways?

0---1---2---3---4---5---6---7---8---9---10

Not at all Unsure Very anxious

26. How anxious are you regarding managing ENT emergencies regarding the ear?

0---1---2---3---4---5---6---7---8---9---10

Not at all Unsure Very anxious

27. How anxious are you regarding managing ENT emergencies regarding the nose?

0---1---2---3---4---5---6---7---8---9---10

Not at all Unsure Very anxious

28. How anxious are you regarding managing ENT emergencies regarding the throat?

0---1---2---3---4---5---6---7---8---9---10

Not at all Unsure Very anxious

Any other comments?
